# Supplementary material for: Targeted capture and massively parallel sequencing of 12 human exomes
Source: Springer Nature journal article supplement (doi:10.1038/nature08250), 2009-08-16
Supplement: 41586_2009_BFnature08250_MOESM250_ESM.pdf [file 41586_2009_BFnature08250_MOESM250_ESM.pdf]

## SUPPLEMENTARY INFORMATION

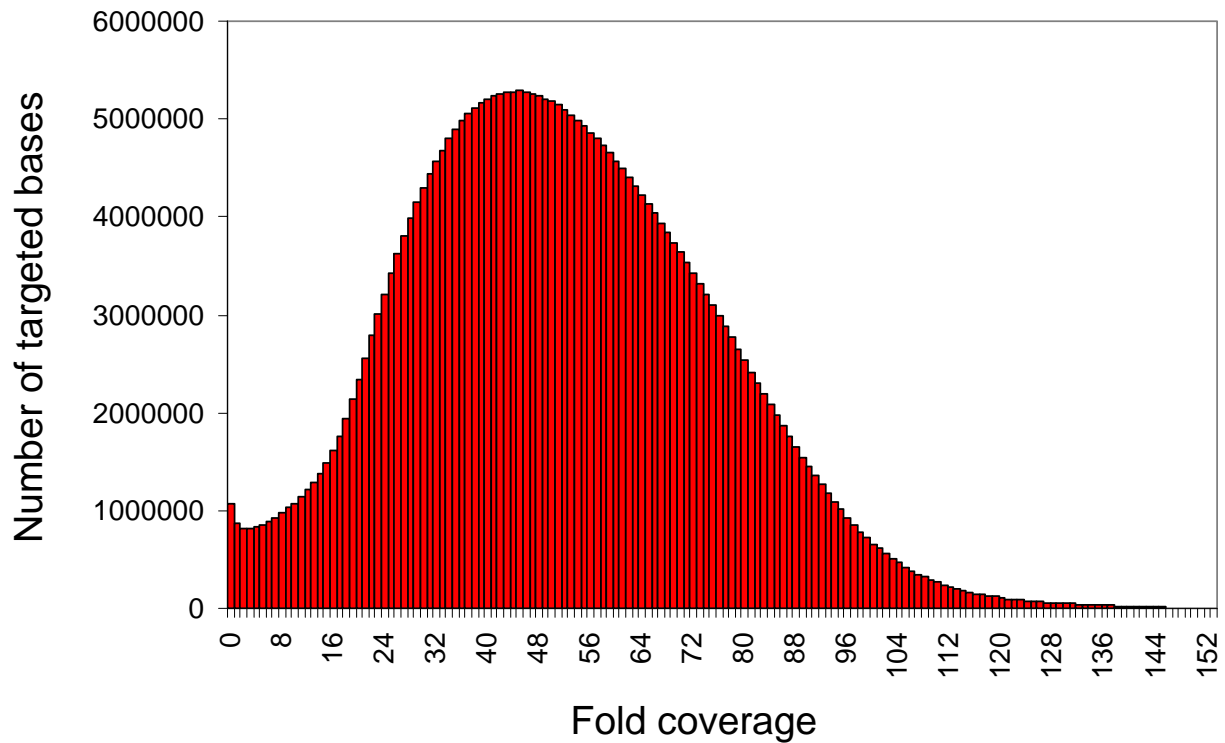**Supplementary Figure 1. Non-cumulative histogram of fold-coverage across 12 exomes.**

The distribution of fold-coverage of mappable, targeted bases (26.6 Mb), summed across the twelve exome datasets (318 Mb aggregate target), is shown. As potential PCR duplicates (reads with the same start-point and orientation within the same genomic library) have been filtered out, the maximum possible coverage of any given position is 152x (i.e. reads from only 76 potential start-points x 2 orientations).

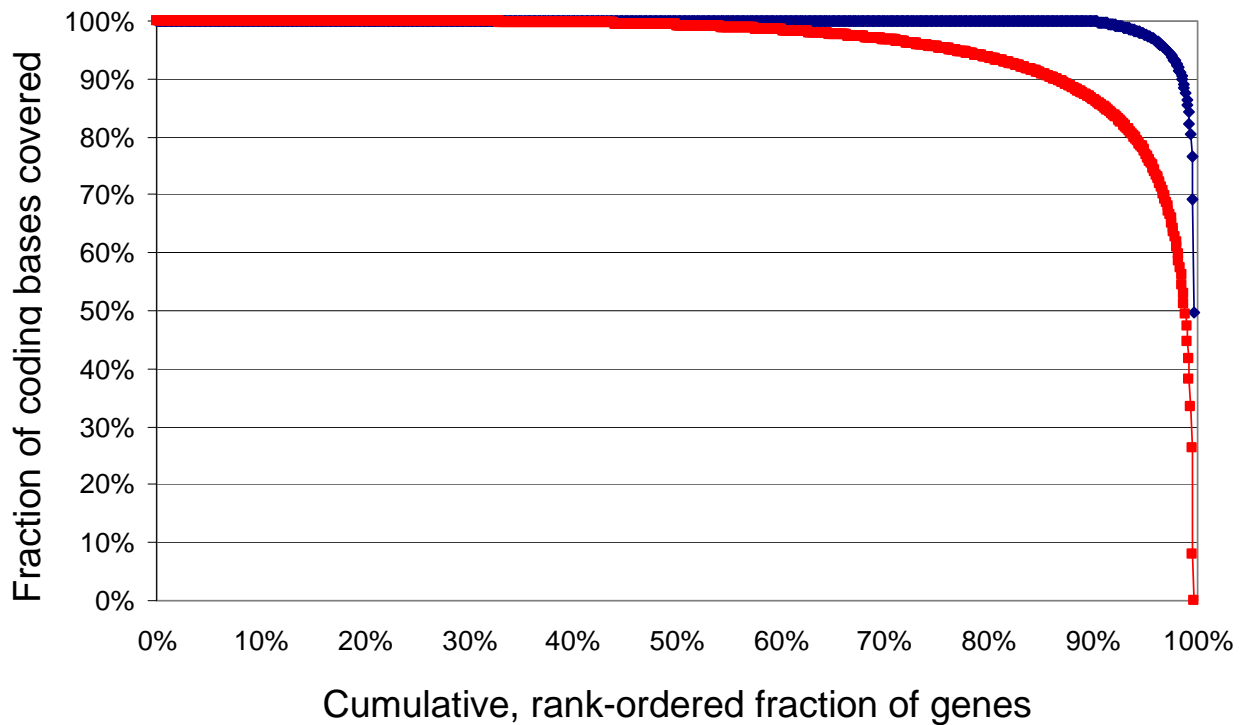

**Supplementary Figure 2. Distribution of completeness on a gene-by-gene basis.** We calculated the fraction of coding bases covered at least 1x (blue) or with sufficient coverage to variant call (red) on a gene-by-gene basis, for 197,952 genes (16,496 genes x 12 individuals). The cumulative, rank-ordered fraction of genes that meet minimum criteria are plotted above. For example, 98% of genes  $\geq 1x$  coverage for at least 95% of their coding bases, while 78% of genes had sufficient coverage for variant calling for at least 95% of their coding bases.

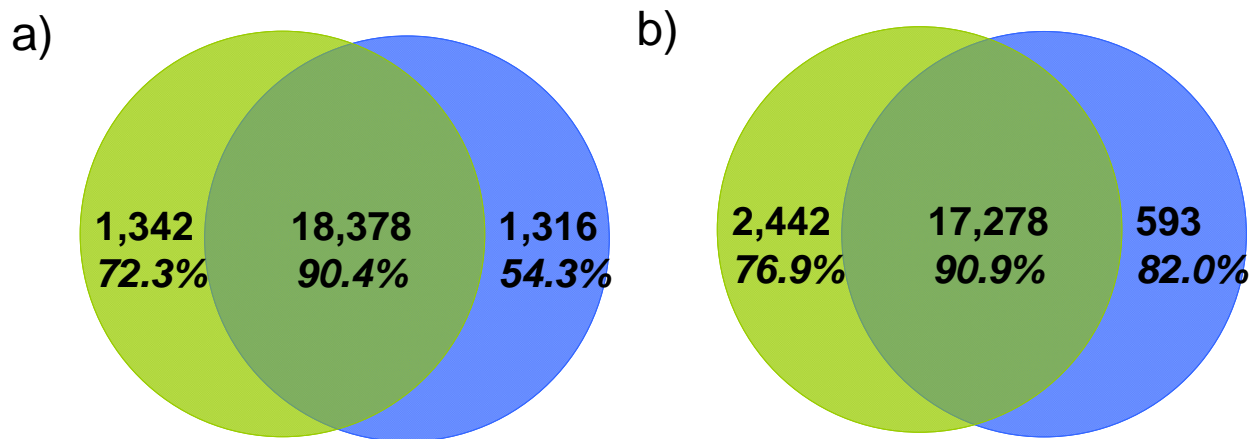

**Supplementary Figure 3. Comparison of cSNPs from exome sequencing and whole genome sequencing of NA18507.** We identified 19,720 cSNPs by exome sequencing of this individual (green circles). In the above Venn diagrams, these are intersected with cSNPs from whole genome sequencing of this individual that overlapped with our exome target (Bentley et al. (2008)) (blue circles). The percentage of each subset confirmed by dbSNP is given below the count. In (a), we used all cSNPs from Bentley et al. (2008) that were called by Maq ( $n = 19,694$ ), whereas in (b), we used only the high-confidence cSNPs from Bentley et al. (2008), i.e. called by both Maq and Eland ( $n = 17,871$ ). In (a), we observe similar numbers of variants that are only called in one data-set, suggesting both sets contain false negatives. The dbSNP-based confirmation rate is modestly higher for the 1,342 variants that are only called in our data-set as compared to the 1,316 variants only called from Bentley et al. (2008) (72.3% versus 54.3%). In (b), we call a much larger number of cSNPs than the high-confidence set from whole genome sequencing (19,720 vs. 17,871). The dbSNP-based confirmation rates for cSNPs called in only one dataset are similar (76.9% versus 82.0%). 78% of the 593 cSNPs called by Bentley et al. (2008) (Maq-Eland intersection) that were not identified here were at coordinates that had insufficient coverage to call in our data.

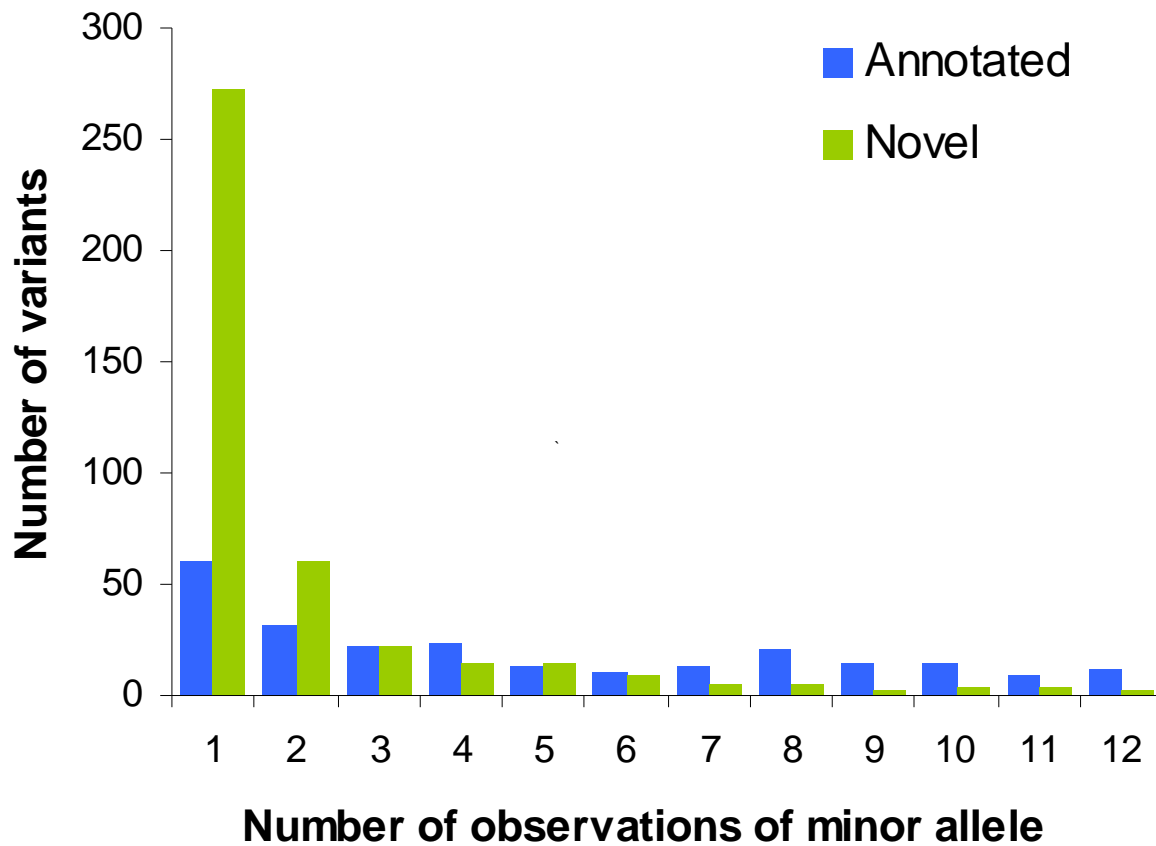

**Supplementary Figure 4. Minor allele frequencies for novel versus previously annotated coding indels.** A histogram of the number of observations of the minor allele for all observed coding indels is shown. Previously annotated (blue) and novel (green) coding indels are plotted separately.

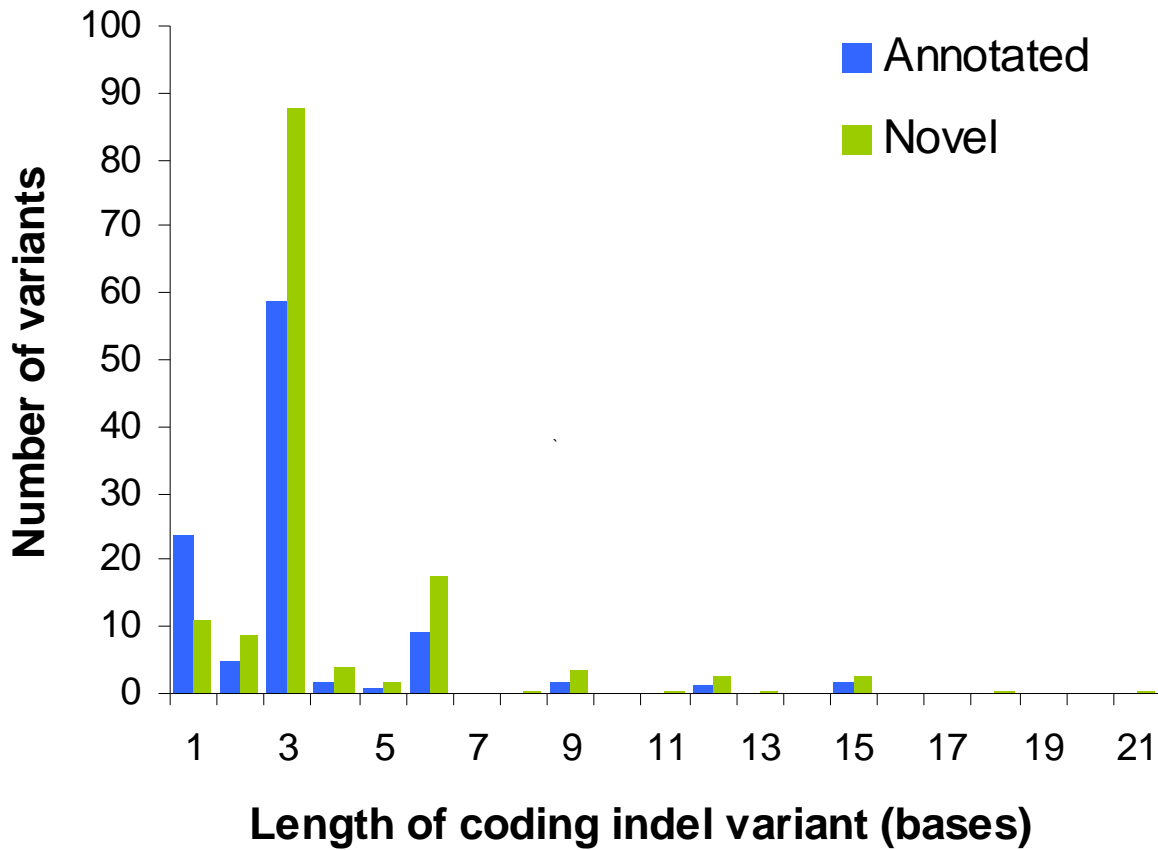

**Supplementary Figure 5. Distribution of lengths of novel versus previously annotated coding indels.** The average number of coding indels called in each of the 12 exomes with various lengths is shown, plotted separately by annotation status.

|                                                    |                                                                   | One Affected  | Two Affecteds | Three Affecteds | All Four Affected |
|----------------------------------------------------|-------------------------------------------------------------------|---------------|---------------|-----------------|-------------------|
| # genes in which each affected has at least one... | nonsynonymous cSNP, splice site variant or coding indel (NS/SS/I) | 4,510 – 4,617 | 3,284 – 3,373 | 2,765 – 2,808   | 2,479             |
|                                                    | NS/SS/I not in dbSNP                                              | 513 – 603     | 115 – 131     | 67 – 71         | 53                |
|                                                    | NS/SS/I not in 8 HapMap exomes                                    | 799 – 912     | 150 – 191     | 49 – 54         | 21                |
|                                                    | NS/SS/I neither in dbSNP nor 8 HapMap exomes                      | 360 – 435     | 29 – 38       | 4 – 8           | 1 (MYH3)          |
|                                                    | ... AND predicted to be damaging                                  | 160 - 210     | 5 – 14        | 1 – 2           | 1 (MYH3)          |

**Supplementary Figure 6. Direct identification of the causal gene for a monogenic disorder by exome sequencing.** Each box lists the number of genes with 1+ nonsynonymous cSNP, splice-site variant, or coding indel (“NS/SS/I” variants) meeting specific criteria. In columns, we show the effect of requiring that 1+ NS/SS/I variants be observed in a given gene in all of 1, 2, 3 or 4 FSS-affected individuals. This figure is identical in format to **Figure 2**, except that we here provide ranges of observations that occur when all possible permutations of 1, 2, or 3 FSS-affected individuals are used.

| Individual     | Mapped Bases         | On Target Bases      | Near Target Bases  | Capture Specificity |
|----------------|----------------------|----------------------|--------------------|---------------------|
| NA18507 (YRI)  | 6,607,484,688        | 2,888,661,709        | 661,786,591        | 54%                 |
| NA18517 (YRI)  | 6,494,342,272        | 2,545,603,815        | 595,560,089        | 48%                 |
| NA19129 (YRI)  | 6,297,755,808        | 2,643,637,650        | 580,152,618        | 51%                 |
| NA19240 (YRI)  | 5,986,557,544        | 2,680,726,944        | 570,797,168        | 54%                 |
| NA18555 (CHB)  | 6,006,434,128        | 2,367,312,059        | 533,865,581        | 48%                 |
| NA18956 (JPT)  | 6,696,487,148        | 2,872,329,417        | 681,969,727        | 53%                 |
| NA12156 (CEU)  | 5,807,479,732        | 1,776,298,679        | 389,939,201        | 37%                 |
| NA12878 (CEU)  | 7,412,509,748        | 3,006,930,065        | 691,105,599        | 50%                 |
| FSS10066 (Eur) | 6,213,695,628        | 2,724,817,939        | 522,381,165        | 52%                 |
| FSS10208 (Eur) | 6,828,499,072        | 2,779,965,715        | 545,984,133        | 49%                 |
| FSS22194 (Eur) | 6,710,279,780        | 2,139,816,034        | 523,364,262        | 40%                 |
| FSS24895 (Eur) | 5,806,226,492        | 2,472,076,217        | 528,472,867        | 52%                 |
| <b>Average</b> | <b>6,405,646,003</b> | <b>2,574,848,020</b> | <b>568,781,583</b> | <b>49%</b>          |

**Supplementary Table 1. Sequencing of twelve exome-enriched shotgun libraries.**

Summary statistics on massively parallel sequencing are shown. All data was collected as unpaired 76 bp reads on the Illumina Genome Analyzer II platform (~10 lanes per individual). For each individual, we show the total number of mapped bases (Maq mapping score > 0), the number of these that align within (“On Target Bases”) or near (“Near Target Bases”) the 164,007 targeted intervals. Near target bases do not fall within a target, but are from reads that directly overlap a target. Capture specificity is calculated as the fraction of reads overlapping a target.

|                                           | <b>Albert <i>et al.</i></b> | <b>Hodges <i>et al.</i></b> | <b>This study</b> |
|-------------------------------------------|-----------------------------|-----------------------------|-------------------|
| % of reads mapping to exon target         | 36%-76%                     | 36%-55%                     | 37%-54%           |
| % of target bases covered $\geq 1x$       | 91.3-98.2%                  | 25%                         | 99.5-99.8%        |
| Estimated sensitivity for variant calling | 62.9-87.8%                  | 60%*                        | 95.5-97.1%        |

**Supplementary Table 2. Comparison to past reports on exonic or exomic array-based capture.** For Albert *et al.*, metrics for capture of 6,726 exonic regions are taken from Supplementary Tables 1 & 2, and we assume that at least 2 non-reference observations would be required to call a variant. For Hodges *et al.*, metrics for all-exome capture are taken from the text or Table 1. \*reported for one of seven arrays only (EC5)



| Individual     | # of coding indels | % in dbSNP | % heterozygous | % 3n in length | % insertions |
|----------------|--------------------|------------|----------------|----------------|--------------|
| NA18507 (YRI)  | 189                | 60%        | 61%            | 68%            | 40%          |
| NA18517 (YRI)  | 204                | 58%        | 68%            | 70%            | 41%          |
| NA19129 (YRI)  | 196                | 56%        | 65%            | 64%            | 42%          |
| NA19240 (YRI)  | 183                | 57%        | 67%            | 70%            | 38%          |
| NA18555 (CHB)  | 145                | 76%        | 53%            | 71%            | 47%          |
| NA18956 (JPT)  | 139                | 71%        | 56%            | 71%            | 47%          |
| NA12156 (CEU)  | 163                | 66%        | 61%            | 75%            | 48%          |
| NA12878 (CEU)  | 146                | 64%        | 58%            | 66%            | 47%          |
| FSS10066 (Eur) | 170                | 59%        | 61%            | 70%            | 49%          |
| FSS10208 (Eur) | 165                | 59%        | 64%            | 70%            | 44%          |
| FSS22194 (Eur) | 152                | 66%        | 66%            | 68%            | 45%          |
| FSS24895 (Eur) | 142                | 65%        | 51%            | 65%            | 44%          |
| <b>Average</b> | <b>166</b>         | <b>63%</b> | <b>61%</b>     | <b>69%</b>     | <b>44%</b>   |

**Supplementary Table 3. Coding indels across 12 human exomes.** The number of called indels in each individual is listed, along with the proportion of these that are annotated in dbSNP (v129), the proportion that are heterozygous, the proportion that have a length that is a multiple of 3, and the proportion that are insertions as opposed to deletions, relative to the reference genome (hg18). YRI = Yoruba HapMap; CHB = Chinese HapMap; JPT = Japanese HapMap; CEU = CEPH HapMap; Eur = European-American ancestry (non-HapMap).

| Individual           | Synonymous cSNPs     | Missense cSNPs      | Nonsense cSNPs | Splice-site SNPs | In-frame Indel | Frameshift Indel |
|----------------------|----------------------|---------------------|----------------|------------------|----------------|------------------|
| NA18507<br>(YRI)     | 10817<br>(987,1620)  | 8862<br>(1143,1629) | 41 (13,17)     | 18 (5,8)         | 128 (48,23)    | 61 (28,19)       |
| NA18517<br>(YRI)     | 10845<br>(1111,1693) | 8838<br>(1282,1644) | 54 (18,18)     | 19 (6,9)         | 142 (60,24)    | 62 (26,16)       |
| NA19129<br>(YRI)     | 10950<br>(1190,1699) | 8761<br>(1258,1621) | 50 (15,18)     | 18 (7,5)         | 125 (54,26)    | 71 (32,17)       |
| NA19240<br>(YRI)     | 10749<br>(1109,1637) | 8719<br>(1225,1582) | 49 (15,16)     | 18 (8,7)         | 128 (56,22)    | 55 (23,15)       |
| NA18555<br>(CHB)     | 8807<br>(489,653)    | 7198<br>(650,790)   | 42 (14,8)      | 21 (5,11)        | 103 (21,7)     | 42 (14,7)        |
| NA18956<br>(JPT)     | 8706<br>(507,674)    | 7257<br>(643,785)   | 48 (13,11)     | 18 (1,3)         | 98 (30,13)     | 41 (11,8)        |
| NA12156<br>(CEU)     | 8750<br>(355,540)    | 7322<br>(503,712)   | 47 (11,5)      | 15 (3,2)         | 123 (46,17)    | 40 (10,7)        |
| NA12878<br>(CEU)     | 8706<br>(380,516)    | 7225<br>(529,632)   | 39 (10,10)     | 18 (8,10)        | 97 (33,13)     | 49 (20,5)        |
| FSS10066<br>(Eur)    | 8822<br>(441,564)    | 7362<br>(629,703)   | 45 (15,12)     | 14 (2,2)         | 119 (49,18)    | 51 (21,12)       |
| FSS10208<br>(Eur)    | 8709<br>(425,520)    | 7322<br>(617,668)   | 42 (13,8)      | 16 (2,6)         | 116 (48,18)    | 49 (20,12)       |
| FSS22194<br>(Eur)    | 8745<br>(374,493)    | 7298<br>(580,652)   | 51 (12,13)     | 14 (2,3)         | 104 (34,10)    | 48 (18,6)        |
| FSS24895<br>(Eur)    | 8783<br>(393,518)    | 7157<br>(553,579)   | 46 (13,8)      | 12 (6,5)         | 92 (31,7)      | 50 (19,9)        |
| Average<br>(YRI)     | 10840<br>(1099,1662) | 8795<br>(1227,1619) | 49 (15,17)     | 18 (7,7)         | 131 (55,24)    | 62 (27,17)       |
| Average<br>(Non-YRI) | 8754<br>(421,560)    | 7268<br>(588,690)   | 45 (13,9)      | 16 (4,5)         | 107 (37,13)    | 46 (17,8)        |
| Average              | 9449<br>(647,927)    | 7777<br>(801,1000)  | 46 (14,12)     | 17 (5,6)         | 115 (43,17)    | 52 (20,11)       |

**Supplementary Table 4. Numbers of variants observed in each individual.** A list of the number of observations of synonymous cSNPs, missense cSNPs, nonsense cSNPs, SNPs that disrupt canonical splice-site bases, in-frame coding indels, and frameshift indels. The first and second numbers in parentheses refer to novel variants (i.e. not in dbSNP) and singleton observations, respectively. Averages (Yoruba, non-African, and overall) are also shown.

| Oligonucleotide  | Sequence                                                                         | Function                                        |
|------------------|----------------------------------------------------------------------------------|-------------------------------------------------|
| SLXA_1_HI        | ACA CTC TTT CCC TAC ACG ACG CTC TTC CGA TCT                                      | Library Adaptor                                 |
| SLXA_1_LO        | /5Phos/GAT CGG AAG AGC GTC GTG TAG GGA AAG AGT GT                                | Library Adaptor                                 |
| SLXA_2_HI        | CAA GCA GAA GAC GGC ATA CGA GCT CTT CCG ATC T                                    | Library Adaptor                                 |
| SLXA_2_LO        | /5Phos/GAT CGG AAG AGC TCG TAT GCC GTC TTC TGC TTG                               | Library Adaptor                                 |
| SLXA_FOR_AMP     | AAT GAT ACG GCG ACC ACC GAG ATC TAC ACT CTT TCC CTA<br>CAC GAC GCT CTT CCG ATC T | Library Amplification,<br>Hybridization Blocker |
| SLXA_REV_AMP     | CAA GCA GAA GAC GGC ATA CGA GCT CTT CCG ATC T                                    | Library Amplification,<br>Hybridization Blocker |
| SLXA_REV_AMP_rev | AGA TCG GAA GAG CTC GTA TGC CGT CTT CTG CTT G                                    | Hybridization Blocker                           |
| SLXA_FOR_AMP_rev | AGA TCG GAA GAG CGT CGT GTA GGG AAA GAG TGT AGA TCT<br>CGG TGG TCG CCG TAT CAT T | Hybridization Blocker                           |

**Supplementary Table 5. Sequences of oligonucleotides used for library construction or blocking.** Oligonucleotide sequences © 2006 Illumina, Inc. All rights reserved.
